# Supplementary material for: One-pot synthesis of PEG modified BaLuF5:Gd/Yb/Er nanoprobes for dual-modal in vivo upconversion luminescence and X-ray bioimaging
Source: Royal Society of Chemistry journal article supplement (doi:10.1039/c4dt01572j), 2014-01-01
Supplement: c4dt01572j1.pdf [file c4dt01572j1.pdf]

SUPPORTING INFORMATION

**One-pot synthesis of PEG modified BaLuF<sub>5</sub>: Gd/Yb/Er  
nanoprobes for dual-modal *in vivo* upconversion  
luminescent and X-ray bioimaging**

**Ling Rao,<sup>a,b</sup> Wei Lu,<sup>c</sup> Tianmei Zeng,<sup>a</sup> Zhigao Yi,<sup>a,b</sup> Haibo Wang,<sup>a,b</sup> Hongrong  
Liu<sup>a</sup> and Songjun Zeng<sup>\*a</sup>**

*a* College of Physics and Information Science and Key Laboratory of Low-dimensional Quantum Structures and Quantum Control of  
the Ministry of Education, Hunan Normal University, Changsha, Hunan, People's Republic of China. Email: [songjunz@hunnu.edu.cn](mailto:songjunz@hunnu.edu.cn)

*b* Faculty of Materials, Optoelectronics and Physics, Key Laboratory of Low-dimensional Materials and Application Technology  
(Ministry of Education), Xiangtan University, Xiangtan 411105, People's Republic of China.

*c* Department of Applied Physics and Materials Research Center, The Hong Kong Polytechnic University, Hong Kong.

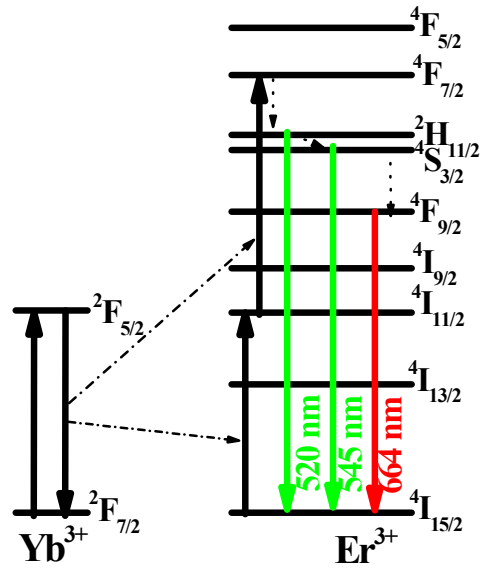

**Fig. s1 Simplified energy level diagrams of Yb<sup>3+</sup>/Er<sup>3+</sup>.** The green and red light centered at 520/545 and 664 nm, which can be attributed to the electronic transition  $^2H_{11/2}/^4S_{3/2} \rightarrow ^4I_{15/2}$  and  $^4F_{9/2} \rightarrow ^4I_{15/2}$  of Er<sup>3+</sup> ions.
